# Supplementary material
Source: Springer Nature journal article supplement (https://www.springermedizin.de/resource/supplementary/12913_2009_1010_MOESM1_ESM.pdf/9536134)

**a. Medical specialist**

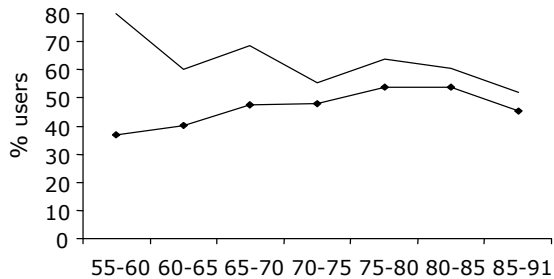

**b. Hospital**

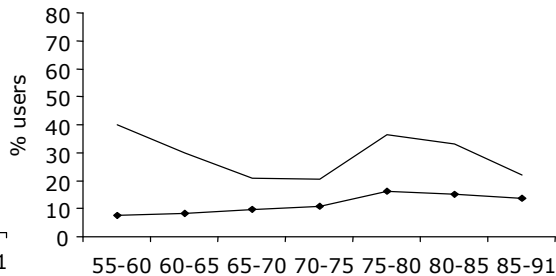

**c. Informal**

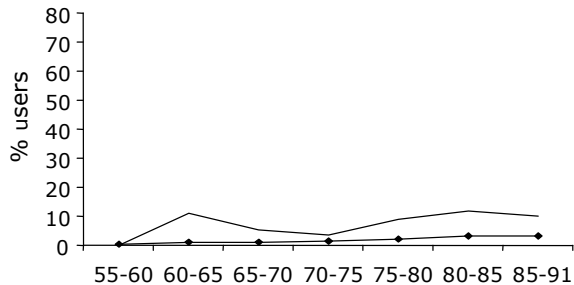

**d. Professional home**

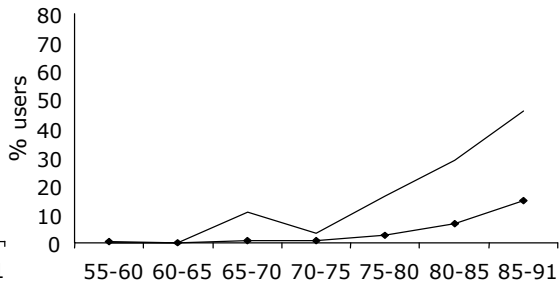

**e. Institutional**

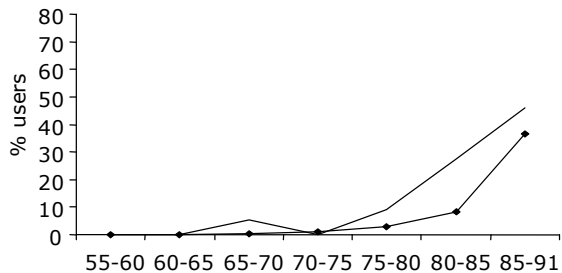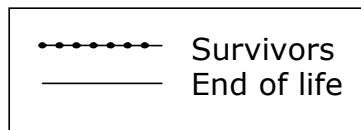

Supplement: MOESM1 [file 9536134]
